# Supplementary material
Source: Copernicus journal article supplement (doi:10.5194/acp-26-7311-2026)
Supplement: Supplementary file 1 [file acp-26-7311-2026-supplement.pdf]

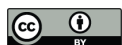

*Supplement of*

## **Highly viscous phase behavior of organic-rich urban PM<sub>2.5</sub>**

**Atta Ullah et al.**

*Correspondence to:* Mijung Song (mijung.song@jbnu.ac.kr)

The copyright of individual parts of the supplement might differ from the article licence.

## 1 **S1. Extraction and droplet generation from PM<sub>2.5</sub> filters**

2 The quartz filters containing PM<sub>2.5</sub> were cut into small pieces and extracted using a 1:1 (v/v) methanol-water solution,  
3 where methanol was high-performance liquid chromatography grade (Sigma-Aldrich), and water had a resistivity of  
4 18.2 MΩ·cm (Millipore, USA). This methanol–water mixture is commonly used for extracting PM<sub>2.5</sub> components  
5 from filters for chemical analysis because it efficiently recovers both hydrophilic inorganic constituents and  
6 hydrophobic organic species across a wide range of polarities (Choi et al., 2017; An et al., 2019; Kim et al., 2025).  
7 After extraction, the solution was sonicated for 1 hr at ~290 K and then filtered through a poly(ether sulfone)  
8 membrane with a 0.05 μm pore size. Micrometer-scale droplets were subsequently generated from the filtered extract  
9 using a nebulizer (MEINHARD, PerkinElmer, USA) and deposited onto a hydrophobic substrate (Hampton Research,  
10 Canada) (Song et al., 2025). This method primarily captures the water and methanol-soluble fraction of PM<sub>2.5</sub>, as  
11 insoluble components are removed during filtration.

## 12 **S2. Chemical compositions of PM<sub>2.5</sub>**

13 The hourly mass concentration of PM<sub>2.5</sub> was measured by a β-ray continuous ambient particle sensor (Thermo  
14 Scientific Inc., model 5014i, USA). The mass concentrations of inorganic ions, such as NO<sub>3</sub><sup>-</sup>, SO<sub>4</sub><sup>2-</sup>, NH<sub>4</sub><sup>+</sup>, Cl<sup>-</sup>, Na<sup>+</sup>,  
15 Ca<sup>2+</sup>, K<sup>+</sup>, and Mg<sup>2+</sup> were determined by ion chromatography (AQUION, Thermo Scientific, Massachusetts, USA)  
16 following procedures described in a previous study (Won et al., 2024). The mass concentrations of ammonium nitrate  
17 (AN) and ammonium sulfate (AS) were calculated from the measured nitrate and sulfate concentrations using Eqs.  
18 (S1) and (S2), respectively (Lan et al., 2018; Xue et al., 2023).

$$AN = NO_3^- \times 1.290 \quad (S1)$$

$$AS = SO_4^{2-} \times 1.375 \quad (S2)$$

19 The mass concentration of organic matter (OM) was determined by subtracting the concentrations of inorganic  
20 compounds from the total PM<sub>2.5</sub>. Meteorological parameters, including temperature and RH, were measured by the  
21 National Institute of Environmental Research in Seoul and an automated meteorological station (Met One Instruments,  
22 Inc., USA) in Beijing (Kim et al., 2022; Qiu et al., 2023). All meteorological data were averaged according to the filter  
23 sample intervals (from 10:00 to 09:00 local time the subsequent day). The O:C ratio of water-soluble organic  
24 compounds (WSOC) in the PM<sub>2.5</sub> filter-collected sample was measured by employing the Fourier-transform ion  
25 cyclotron resonance mass spectrometer (FT-ICR MS) as detailed in previous studies (Choi et al., 2017; Song et al.,  
26 2022).

## 27 **S3. Conditioning time of PM<sub>2.5</sub> droplets under controlled RH conditions**

28 In the poke-and-flow experiment, PM<sub>2.5</sub> droplets with a diameter of ~40 μm were deposited on a hydrophobic substrate  
29 and allowed to equilibrate under the specified RH of the carrier gas. To verify whether the droplets approached near-  
30 equilibrium with the target RH, we applied a previously established method that incorporates measured viscosity  
31 values and the corresponding water diffusion coefficient (Evoy et al., 2021; Maclean et al., 2021; Smith et al., 2021;

32 Kiland et al., 2023). This approach compares the experimental conditioning time with the characteristic mixing time  
 33 of water within organic aerosol (OA),  $\tau_{mix, H_2O}$ , calculated as follows:

$$\tau_{mix, H_2O} = \frac{d_p^2}{4\pi^2 D_{H_2O}(T, RH)} \quad (S3)$$

34 Here,  $d_p$  represents the particle diameter.  $D_{H_2O}(T, RH)$  is the RH- and temperature-dependent diffusion coefficient of  
 35 water in OA. The value of  $D_{H_2O}(T, RH)$  was calculated using the fractional Stokes–Einstein equation, which considers  
 36 the relationship between viscosity and diffusion when the diffusing species are comparable in size to, or smaller than  
 37 the molecules forming the OA matrix (Evoy, 2020):

$$D_{H_2O}(T, RH) = D^{\circ}_{H_2O}(T) \times \left( \frac{\eta^{\circ}_{H_2O}(T)}{\eta(T, RH)} \right)^{\xi} \quad (S4)$$

38 In this equation,  $D^{\circ}_{H_2O}(T)$  is the self-diffusion of water calculated with the Stokes-Einstein equation at 290 K ( $2.12$   
 39  $\times 10^{-9} \text{ m}^2 \text{ s}^{-1}$ ).  $\eta^{\circ}_{H_2O}(T)$  is the viscosity of pure water obtained from literature with a value of  $\sim 1 \times 10^{-3} \text{ Pa}\cdot\text{s}$  at 290 K  
 40 (Weight, 2019).  $\eta(T, RH)$  is the measured viscosity of the PM<sub>2.5</sub> droplet at the corresponding RH and temperature.  $\xi$   
 41 is the fractional exponent obtained using Eq. (S5), which accounts for the relative size of the diffusing molecule and  
 42 the surrounding OA matrix:

$$\xi = 1 - \left[ A \times \exp \left( -B \frac{r_{diff}}{r_{matrix}} \right) \right] \quad (S5)$$

43 where coefficient values of  $A = 0.73$  and  $B = 1.79$  (Evoy et al., 2020), the hydrodynamic radius of water was taken as  
 44  $r_{diff} = 0.1 \text{ nm}$  (Price et al., 2016), and the hydrodynamic radius of the matrix molecule was fixed at  $r_{matrix} = 0.44 \text{ nm}$ ,  
 45 adopted from Evoy et al. (2020) where it was derived from molecular-weight and liquid-density data for sucrose,  
 46 consistent with prior aerosol viscosity studies employing the fractional Stokes–Einstein framework (Maclean et al.,  
 47 2021; Kiland et al., 2023). Using this value in Eq. (S5) yields a fractional exponent of  $\xi = 0.51$ . The conditioning time  
 48 used in this study is summarized in Table S1.

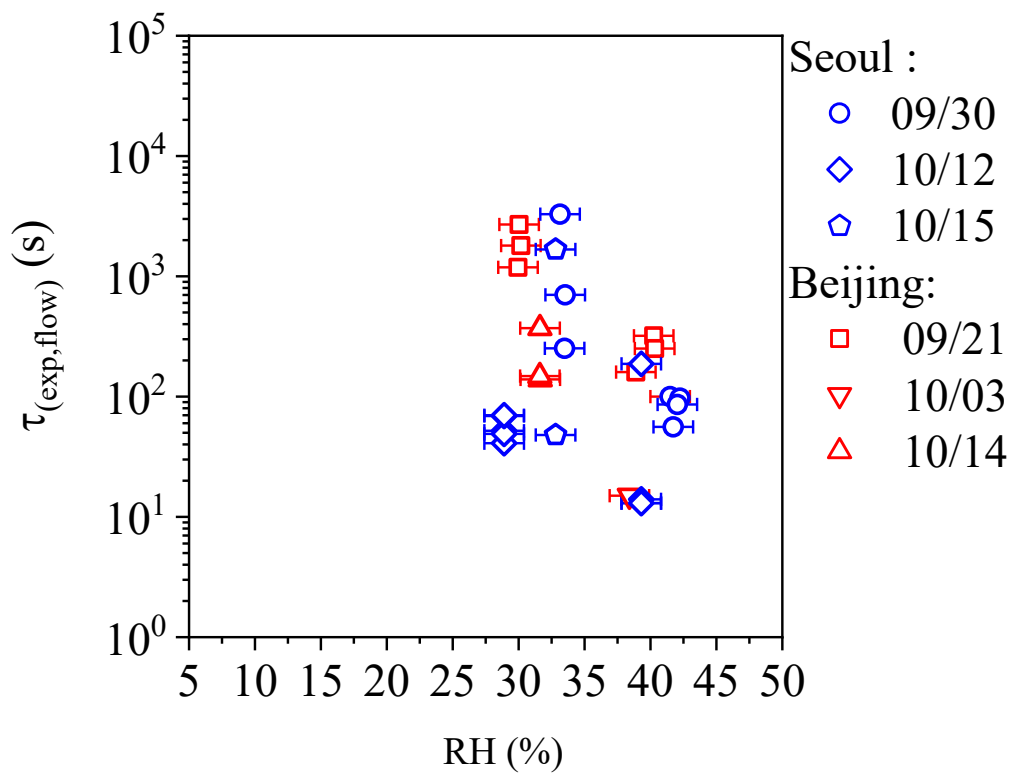

50  
 51 **Figure S1. Characteristic experimental flow time  $\tau_{(exp,flow)}$  of PM<sub>2.5</sub> droplets determined using the poke-and-**  
 52 **flow technique for samples collected on different dates in Seoul and Beijing. Each symbol represents an**  
 53 **individual  $\tau_{(exp,flow)}$  value obtained by poking a single particle at a specific RH. The x-axis error bars represent**  
 54 **the RH sensor uncertainty ( $\pm 1.5\%$ ), as determined from our RH sensor calibration in the flow cell.**

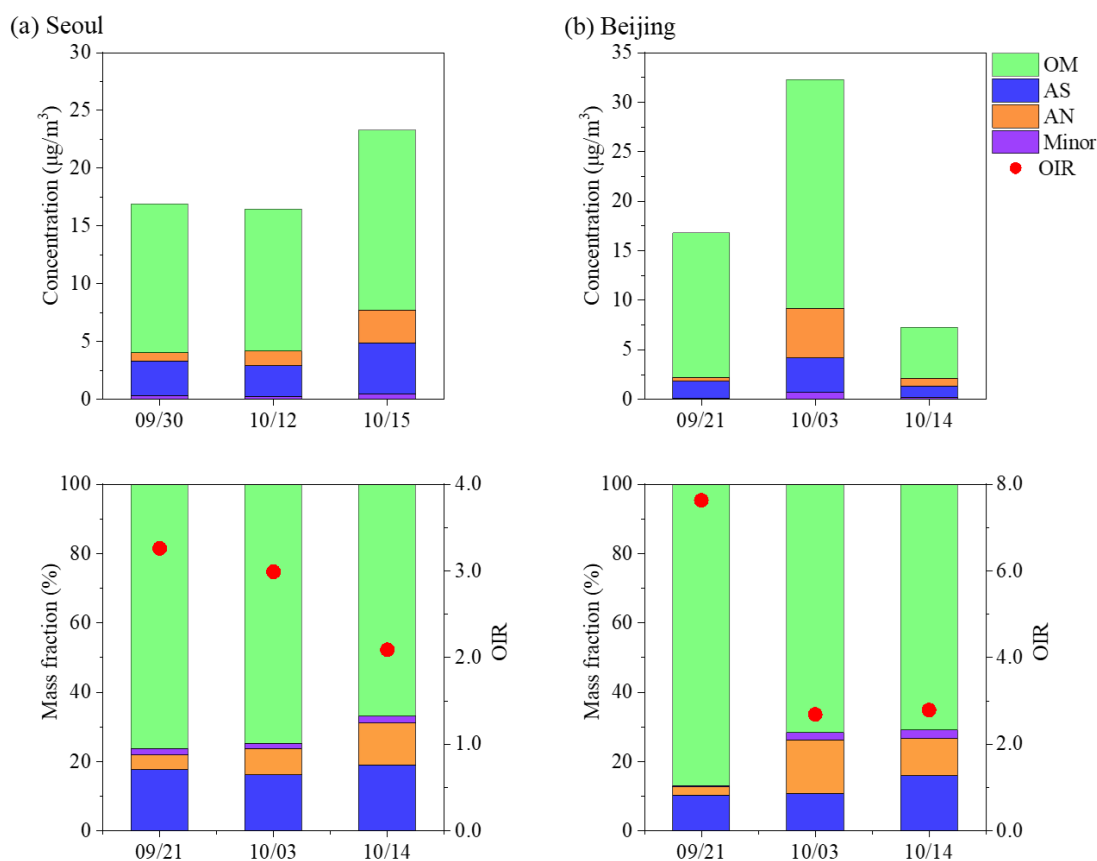

55  
 56 **Figure S2. Chemical composition of PM<sub>2.5</sub> in (a) Seoul and (b) Beijing.** For each site, the upper panel shows the  
 57 concentrations of total PM<sub>2.5</sub> and its major components, including organic matter (OM), ammonium sulphate  
 58 (AS), ammonium nitrate (AN), and minor inorganic ions such as Cl<sup>-</sup>, Na<sup>+</sup>, Ca<sup>2+</sup>, K<sup>+</sup>, and Mg<sup>2+</sup>. The lower panel  
 59 shows the corresponding mass fractions (%). The mean OM concentration was estimated by subtracting the  
 60 measured inorganic components from the total PM<sub>2.5</sub> concentration.

61

62 **Table S1.** Overview of conditioning times for PM<sub>2.5</sub> droplets under different RH conditions. The parameter  $\tau_{mix,H_2O}$   
 63 represents the characteristic timescale for internal water mixing time within the droplets, derived from the water  
 64 diffusion coefficient inferred from viscosity at the corresponding RH. The term  $\tau_{conditioning}$  refers to the experimentally  
 65 defined period during which droplets were held at a specified RH to equilibrate with the surrounding gas phase.  
 66 Calculations were based on a 40  $\mu\text{m}$  droplet diameter, representing the upper-limit droplet size used in the poke-and-  
 67 flow experiments.

| Sample          | RH | $\tau_{conditioning}$ (h) | $\tau_{mix,H_2O}$ (h) | $\tau_{conditioning} / \tau_{mix,H_2O}$ |
|-----------------|----|---------------------------|-----------------------|-----------------------------------------|
| Seoul (09/30)   | 41 | 1.0                       | 0.13                  | 7.6                                     |
| Seoul (09/30)   | 33 | 1.0                       | 0.54                  | 1.9                                     |
| Seoul (10/12)   | 39 | 1.0                       | 0.21                  | 4.7                                     |
| Seoul (10/12)   | 29 | 1.0                       | 0.10                  | 10.5                                    |
| Seoul (10/12)   | 33 | 1.0                       | 0.46                  | 2.2                                     |
| Beijing (09/21) | 40 | 1.0                       | 0.25                  | 3.9                                     |
| Beijing (09/21) | 30 | 1.0                       | 0.99                  | 1.0                                     |
| Beijing (10/03) | 38 | 1.0                       | 0.04                  | 23.0                                    |
| Beijing (10/14) | 32 | 1.0                       | 0.22                  | 4.6                                     |

68

## 69 References

- 70 An, Y., Xu, J., Feng, L., Zhang, X., Liu, Y., Kang, S., Jiang, B., and Liao, Y.: Molecular characterization of organic  
71 aerosol in the Himalayas: insight from ultra-high-resolution mass spectrometry, *Atmos. Chem. Phys.*, 19, 1115–1128,  
72 <https://doi.org/10.5194/acp-19-1115-2019>, 2019.
- 73 Choi, J. H., Ryu, J., Jeon, S., Seo, J., Yang, Y.-H., Park, S. P., Choung, S., and Jang, K.-S.: In-depth compositional  
74 analysis of water-soluble and -insoluble organic substances in fine (PM<sub>2.5</sub>) airborne particles using ultra-high-  
75 resolution 15T FT-ICR MS and GC×GC-TOFMS, *Environ. Pollut.*, 225, 329–337,  
76 <https://doi.org/10.1016/j.envpol.2017.02.058>, 2017.
- 77 Evoy, E.: The relationship between diffusion coefficients and viscosity in organic-water matrices as proxies for  
78 secondary organic aerosol, PHD thesis, The University of British Columbia, Vancouver, Canada, 2020.
- 79 Evoy, E., Kamal, S., Patey, G. N., Martin, S. T., and Bertram, A. K.: Unified description of diffusion coefficients from  
80 small to large molecules in organic–water mixtures, *J. Phys. Chem. A*, 124, 2301–2308,  
81 <https://doi.org/10.1021/acs.jpca.9b11271>, 2020.
- 82 Evoy, E., Kiland, K. J., Huang, Y., Schnitzler, E. G., Maclean, A. M., Kamal, S., Abbatt, J. P. D., and Bertram, A. K.:  
83 Diffusion coefficients and mixing times of organic molecules in  $\beta$ -caryophyllene secondary organic aerosol (SOA)  
84 and biomass burning organic aerosol (BBOA), *ACS Earth Space Chem.*, 5, 3268–3278,  
85 <https://doi.org/10.1021/acsearthspacechem.1c00317>, 2021.
- 86 Kiland, K. J., Mahrt, F., Peng, L., Nikkho, S., Zaks, J., Crescenzo, G. V., and Bertram, A. K.: Viscosity, glass formation,  
87 and mixing times within secondary organic aerosol from biomass burning phenolics, *ACS Earth Space Chem.*, 7,  
88 1388–1400, <https://doi.org/10.1021/acsearthspacechem.3c00039>, 2023.
- 89 Kim, J. Y., Kim, Y. P., Yu, X., Yu, J., Wu, Z., Lee, H.-M., Song, M., Jang, K. S., Kim, C., Choi, N. R., and Lee, J. Y.:  
90 Concentrations and formation pathways of nitrogen-containing organic compounds in PM<sub>2.5</sub> from Seoul and Beijing,  
91 *Environ. Res.*, 286, 122959, <https://doi.org/10.1016/j.envres.2025.122959>, 2025.
- 92 Kim, N. K., Kim, Y. P., Ghim, Y. S., Song, M. J., Kim, C. H., Jang, K. S., Lee, K. Y., Shin, H. J., Jung, J. S., Wu, Z.,  
93 Matsuki, A., Tang, N., Sadanaga, Y., Kato, S., Natsagdorj, A., Tseren-Ochir, S., Baldorj, B., Song, C.-K., and Lee, J.  
94 Y.: Spatial distribution of PM<sub>2.5</sub> chemical components during winter at five sites in Northeast Asia: High temporal  
95 resolution measurement study, *Atmos. Environ.*, 290, 119359, <https://doi.org/10.1016/j.atmosenv.2022.119359>, 2022.
- 96 Lan, Z., Zhang, B., Huang, X., Zhu, Q., Yuan, J., Zeng, L., Hu, M., and He, L.: Source apportionment of PM<sub>2.5</sub> light  
97 extinction in an urban atmosphere in China, *J. Environ. Sci.*, 63, 277–284, <https://doi.org/10.1016/j.jes.2017.07.016>,  
98 2018.
- 99 Maclean, A. M., Li, Y., Crescenzo, G. V., Smith, N. R., Karydis, V. A., Tsimpidi, A. P., Butenhoff, C. L., Faiola, C. L.,  
100 Lelieveld, J., Nizkorodov, S. A., Shiraiwa, M., and Bertram, A. K.: Global Distribution of the Phase State and Mixing  
101 Times within Secondary Organic Aerosol Particles in the Troposphere Based on Room-Temperature Viscosity  
102 Measurements, *ACS Earth Space Chem.*, 5, 3458–3473, <https://doi.org/10.1021/acsearthspacechem.1c00296>, 2021.
- 103 Price, H. C., Mattsson, J., and Murray, B. J.: Sucrose diffusion in aqueous solution, *Phys. Chem. Chem. Phys.*, 18,  
104 19207–19216, <https://doi.org/10.1039/c6cp03238a>, 2016.

105 Qiu, Y., Wu, Z., Man, R., Zong, T., Liu, Y., Meng, X., Chen, J., Chen, S., Yang, S., and Yuan, B.: Secondary aerosol  
106 formation drives atmospheric particulate matter pollution over megacities (Beijing and Seoul) in East Asia, *Atmos.*  
107 *Environ.*, 301, 119702, <https://doi.org/10.1016/j.atmosenv.2023.119702>, 2023.

108 Smith, N. R., Crescenzo, G. V., Huang, Y. Z., Hettiyadura, A. P. S., Siemens, K., Li, Y., Faiola, C. L., Laskin, A.,  
109 Shiraiwa, M., Bertram, A. K., and Nizkorodov, S. A.: Viscosity and liquid-liquid phase separation in healthy and  
110 stressed plant SOA, *Environ. Sci.: Atmos.*, 1, 140–153, <https://doi.org/10.1039/d0ea00020e>, 2021.

111 Song, M., Jeong, R., Kim, D., Qiu, Y., Meng, X., Wu, Z., and Ahn, J.: Comparison of phase states of PM<sub>2.5</sub> over  
112 megacities, Seoul and Beijing, and their implications on particle size distribution, *Environ. Sci. Technol.*, 56, 17581–  
113 17590, <https://doi.org/10.1021/acs.est.2c06377>, 2022.

114 Song, M., Li, Y., Seong, C., Yang, H., Jang, K.-S., Wu, Z., Lee, J. Y., Matsuki, A., and Ahn, J.: Direct observation of  
115 liquid–liquid phase separation and core–shell morphology of PM<sub>2.5</sub> collected from three Northeast Asian cities and  
116 implications for N<sub>2</sub>O<sub>5</sub> hydrolysis, *ACS ES&T Air*, 2, 1079–1088, <https://doi.org/10.1021/acsestair.5c00043>, 2025.

117 Weight, W. D.: *Practical Hydrogeology: Principles and field applications*, McGraw Hill Professional, Newyork, 2019.

118 Won, S. R., Lee, K., Song, M., Kim, C., Jang, K.-S., and Lee, J. Y.: Characteristic of PM<sub>2.5</sub> concentration and source  
119 apportionment during winter in Seosan, Korea, *Asian J. Atmos. Environ.*, 18, 22, [https://doi.org/10.1007/s44273-024-](https://doi.org/10.1007/s44273-024-00044-x)  
120 [00044-x](https://doi.org/10.1007/s44273-024-00044-x), 2024.

121 Xue, Q., Liu, X., Tian, Y., and Feng, Y.: Variations of inhalation risks during different heavy pollution episodes based  
122 on 3-year measurement of toxic components in size-segregated particles, *Sci. Total Environ.*, 880, 163234,  
123 <https://doi.org/10.1016/j.scitotenv.2023.163234>, 2023.

124
